# Supplementary material for: Antioxidant Activity of Thyme Waste Extract in O/W Emulsions
Source: PubMed Central journal article supplement (PMC6719112; doi:10.3390/antiox8080243), 2019-07-25
Supplement: antioxidants-08-00243-s001.pdf [file antioxidants-08-00243-s001.pdf]

# Antioxidant activity of thyme waste extract in O/W emulsions

**Soukaina El-Guendouz<sup>1,2</sup>, Smail Aazza<sup>3</sup>, Susana Anahi Dandlen<sup>2</sup>, Nessrine Majdoub<sup>2</sup>, Badiaa Lyoussi<sup>1</sup>, Sara Raposo<sup>4</sup>, Maria Dulce Antunes<sup>5</sup>, Vera Gomes<sup>6</sup>, Maria Graça Miguel<sup>2\*</sup>**

<sup>1</sup>Laboratory of Physiology-Pharmacology-Environmental Health, Faculty of Sciences Dhar El Mehraz, BP 1796 Atlas, University Sidi Mohamed Ben Abdallah, Fez 30 000, Morocco.

<sup>2</sup>Department of Chemistry and Pharmacy, MeditBio, Faculty of Science and Technology, University of Algarve, Campus de Gambelas, 8005-139 Faro, Portugal.

<sup>3</sup>Laboratory of phytochemistry, National Agency of Medicinal and Aromatic Plants (ANPMA). BP. 159, Principal, 34000, Taounate. Morocco.

<sup>4</sup>Centre for Marine and Environmental Research (CIMA), Faculty of Sciences and Technology, University of Algarve, Campus de Gambelas, 8005-139 Faro. Portugal.

<sup>5</sup>MeditBio / CEOT, Faculty of Science and Technology, University of Algarve, Campus de Gambelas, 8005-139 Faro, Portugal.

<sup>6</sup>Centre of Marine Sciences (CCMAR), University of Algarve, Campus de Gambelas, 8005-139 Faro, Portugal

Correspondence: [mgmiguel@ualg.pt](mailto:mgmiguel@ualg.pt)

**Table S1.** Apparent viscosity of the emulsions with thyme extract and BHA, at different concentrations (0.01, 0.02 and 0.04 %), under storage conditions of 10 weeks at 37 °C. Apparent viscosity (mPa.s) was determined at a shear rate of 6.3 s<sup>-1</sup>, with a LV-3C spindle. Values of mean (n=4) ± standard deviation.

|        |               | <b>A 100% of Germ wheat oil / 0% almond oil</b> |                | <b>B 75% of Germ wheat oil / 25% almond oil</b> |                | <b>C 50% of Germ wheat oil / 50% almond oil</b> |                | <b>D 25% of Germ wheat oil / 75% almond oil</b> |                | <b>E 0% of Germ wheat oil / 100% almond oil</b> |                |
|--------|---------------|-------------------------------------------------|----------------|-------------------------------------------------|----------------|-------------------------------------------------|----------------|-------------------------------------------------|----------------|-------------------------------------------------|----------------|
|        |               | <b>Week 0</b>                                   | <b>Week 10</b> | <b>Week 0</b>                                   | <b>Week 10</b> | <b>Week 0</b>                                   | <b>Week 10</b> | <b>Week 0</b>                                   | <b>Week 10</b> | <b>Week 0</b>                                   | <b>Week 10</b> |
| 0.01 % | Control       | 2020±34                                         | 1834±59        | 1852±23                                         | 1884±57        | 1796±06                                         | 1872±57        | 1844±28                                         | 1776±51        | 1826±37                                         | 1736±34        |
|        | <i>Thymus</i> | 1823±10                                         | 1744±15        | 1984±24                                         | 1776±37        | 2028±21                                         | 1780±39        | 1920±18                                         | 1696±27        | 1904±41                                         | 1720±27        |
|        | BHA           | 1760±00                                         | 1936±34        | 1822±14                                         | 2004±85        | 1754±25                                         | 1844±45        | 1820±34                                         | 1858±65        | 1784±34                                         | 1832±45        |
| 0.02 % | Control       | 2020±34                                         | 1834±59        | 1852±23                                         | 1884±57        | 1796±06                                         | 1872±57        | 1844±28                                         | 1776±51        | 1826±37                                         | 1736±34        |
|        | <i>Thymus</i> | 1720±42                                         | 2132±11        | 1723±15                                         | 2058±69        | 1860±14                                         | 2116±87        | 1848±57                                         | 2136±24        | 1848±34                                         | 1988±34        |
|        | BHA           | 1640±51                                         | 1716±85        | 1716±23                                         | 1722±37        | 1684±57                                         | 1676±28        | 1634±14                                         | 1642±31        | 1594±08                                         | 1620±23        |
| 0.04 % | Control       | 2020±34                                         | 1834±59        | 1852±23                                         | 1884±57        | 1796±06                                         | 1872±57        | 1844±28                                         | 1776±51        | 1826±37                                         | 1736±34        |
|        | <i>Thymus</i> | 1884±35                                         | 2256±47        | 2060±84                                         | 2399±34        | 2080±97                                         | 2451±37        | 1824±54                                         | 2144±49        | 2008±23                                         | 2156±66        |
|        | BHA           | 1680±68                                         | 2046±42        | 1418±42                                         | 1708±62        | 1558±54                                         | 1700±40        | 1526±65                                         | 1685±37        | 1546±31                                         | 1692±74        |
